# Supplementary material for: Mediterranean Diet Pyramid: A Proposal for Italian People. A Systematic Review of Prospective Studies to Derive Serving Sizes
Source: Nutrients. 2019 Jun 7;11(6):1296. doi: 10.3390/nu11061296 (PMC6628543; doi:10.3390/nu11061296)
Supplement: Supplementary file 1 [file nutrients-11-01296-s001.pdf]

Supplementary Table S1. Weekly menu plan based on advice of Mediterranean Diet Pyramid for Italian People

[illegible]

[illegible]
